# Supplementary figures and images for: Multiparametric grading of glaucoma severity by histopathology can enable post-mortem substratification of disease state
Source: PubMed Central journal article supplement — Acta Neuropathol Commun. 2025 Jan 6;13:3. doi: 10.1186/s40478-024-01880-2 (PMC11702176; doi:10.1186/s40478-024-01880-2), 2025-01-06

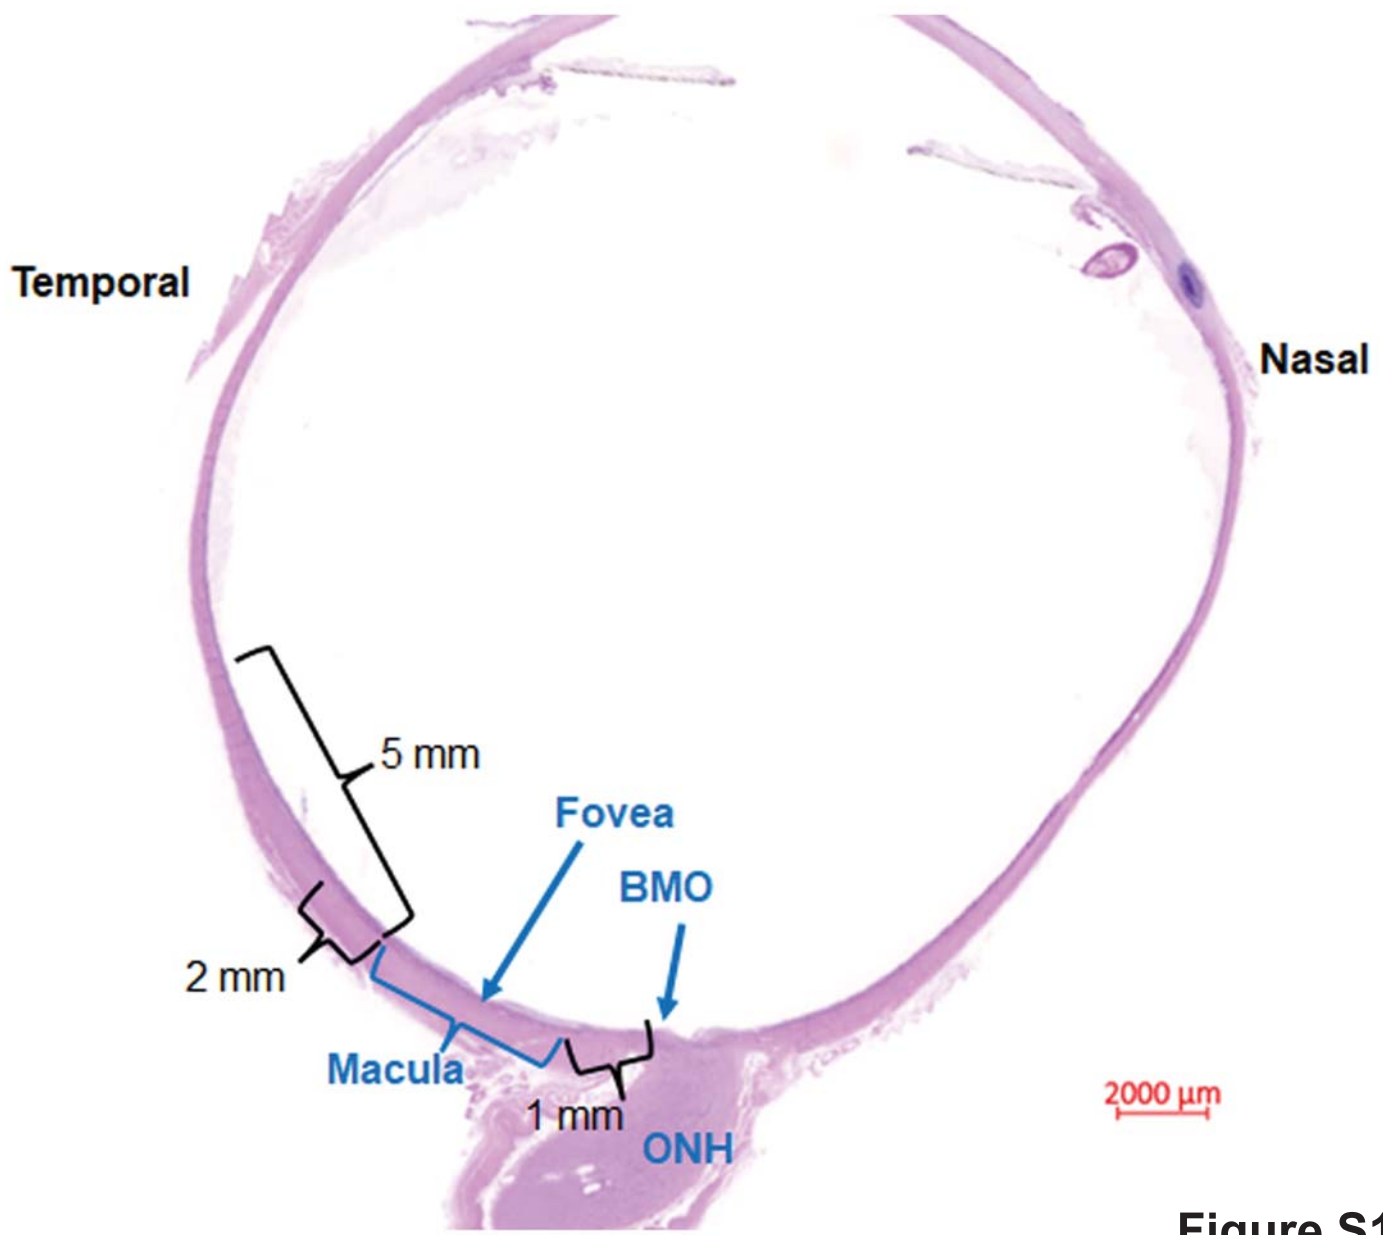

**Figure S1**

**Figure S2**

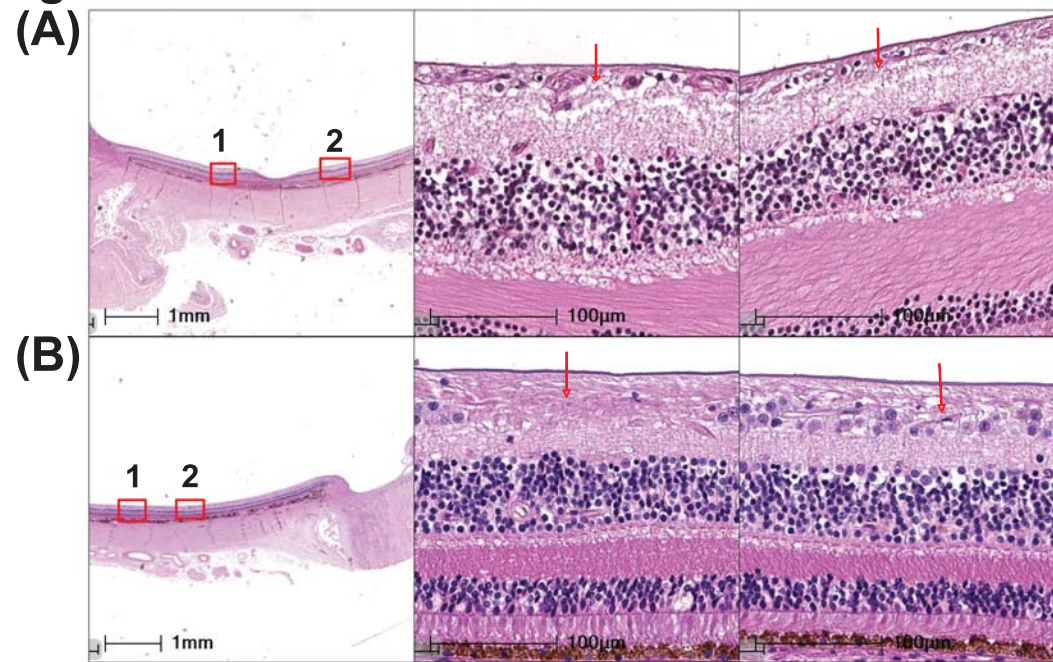

**Figure S3**

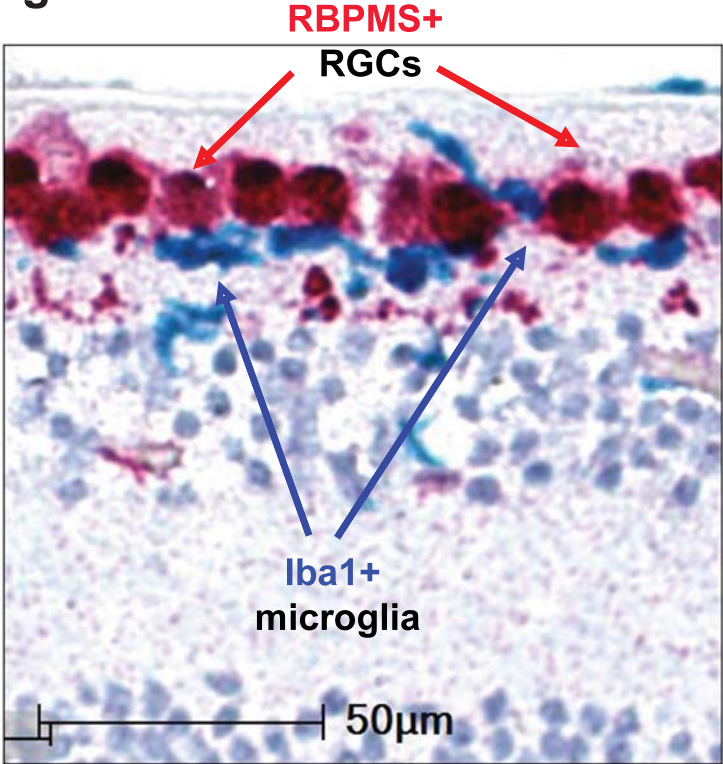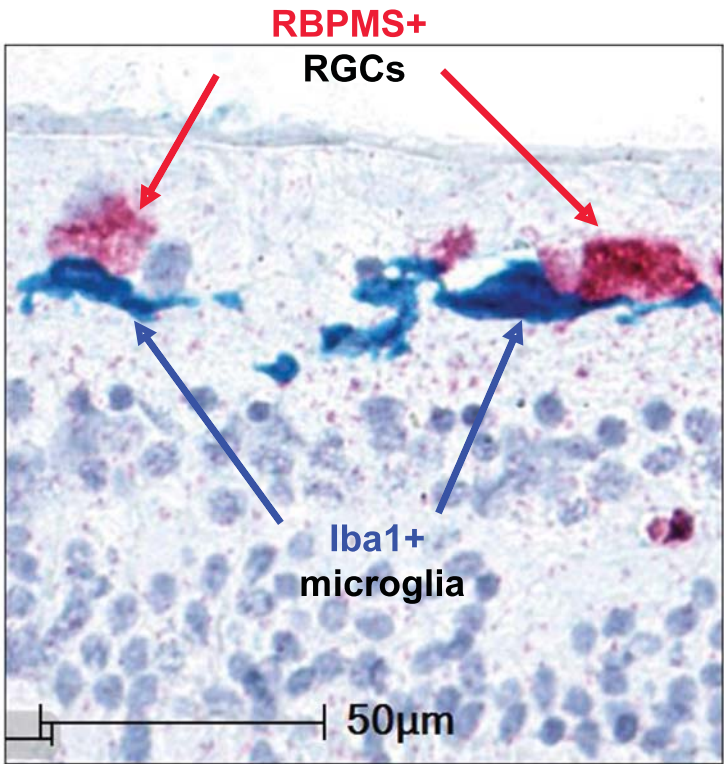

**Figure S4**

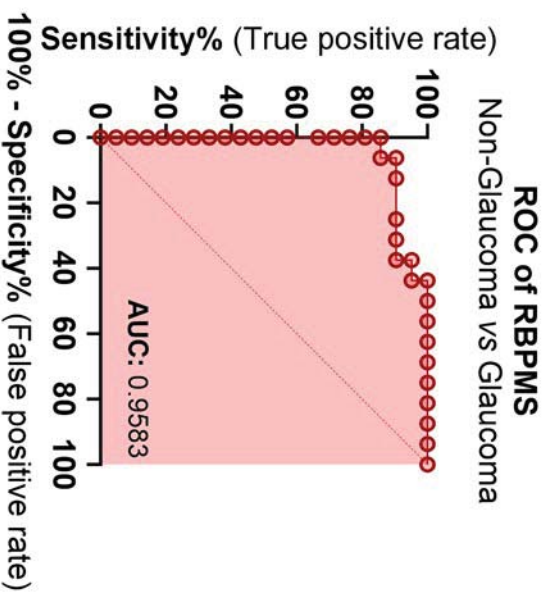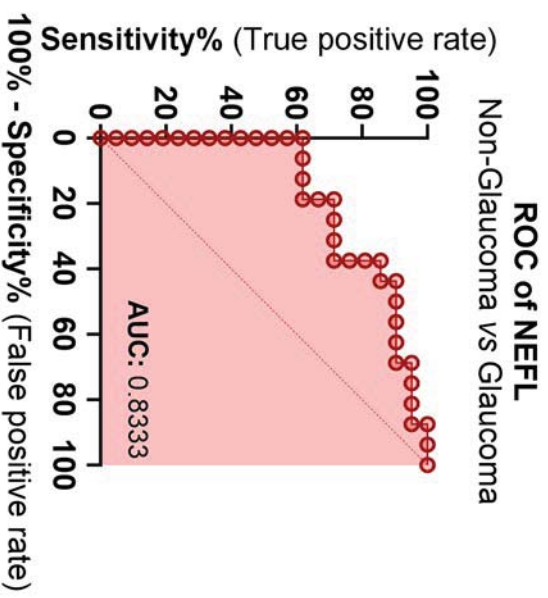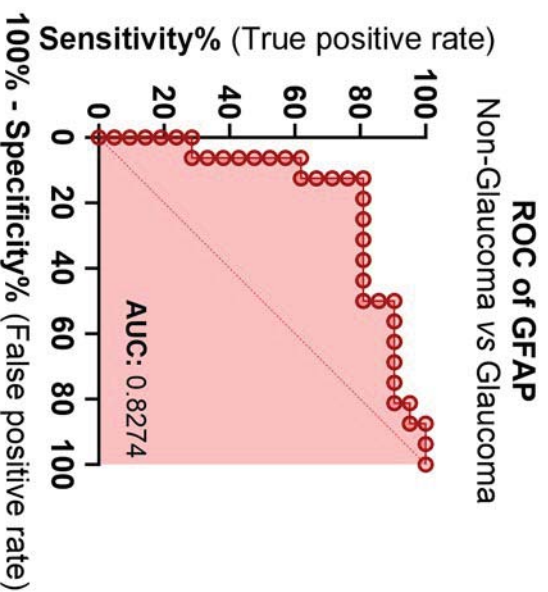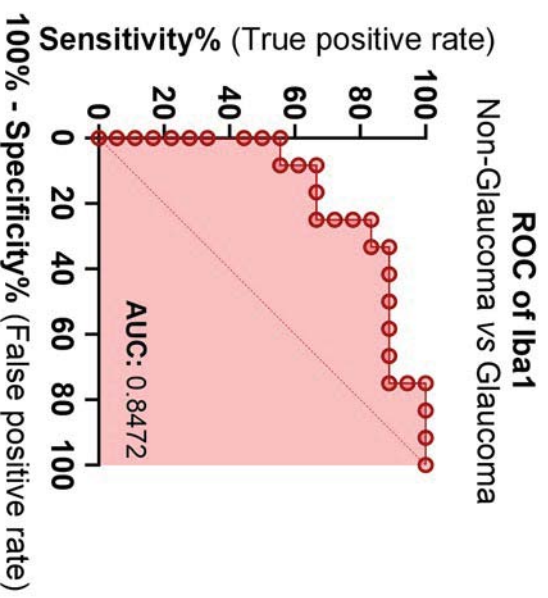

Supplement: 40478_2024_1880_MOESM1_ESM.pdf [file 40478_2024_1880_MOESM1_ESM.pdf]
